# Supplementary material for: Unraveling endophytic diversity in dioecious Siraitia grosvenorii: implications for mogroside production
Source: Springer Nature journal article supplement (doi:10.1007/s00253-024-13076-8), 2024-03-01
Supplement: MOESM1 [file 253_2024_13076_MOESM1_ESM.pdf]

Supplementary Material

**Unraveling endophytic diversity in dioecious *Siraitia grosvenorii*: implications for mogroside production**

**Anish Tamang<sup>1,3,#</sup>, Amanpreet Kaur <sup>1,#</sup>, Deepali Thakur <sup>1,#</sup>, Ankita Thakur <sup>1,3</sup>, Babit Kumar Thakur<sup>2,3</sup>, Shivani<sup>2,3</sup>, Mohit Swarnkar<sup>1</sup>, Probir K. Pal<sup>2,3</sup>, Vipin Hallan<sup>1,3</sup> and Shiv Shanker Pandey<sup>1,3,\*</sup>**

<sup>1</sup>Biotechnology Division, CSIR-Institute of Himalayan Bioresource Technology (IHBT), Palampur- 176061 (H.P), India.

<sup>2</sup>Division of Agrotechnology of Medicinal, Aromatic and Commercially Important Plants, Council of Scientific and Industrial Research-Institute of Himalayan Bioresource Technology (CSIR-IHBT), Post Box No. 6, Palampur, 176 061, HP, India

<sup>3</sup>Academy of Scientific and Innovative Research (AcSIR), Ghaziabad- 201002, India.

**\*Corresponding author: Shiv Shanker Pandey, E-mail: shivpandey@ihbt.res.in**

**Table S1 Relative abundance of different taxa present in male and female *S. grosvenorii* plants**

| <b>Taxonomic identification</b> | <b>%</b>         | <b>Taxonomic identification</b>   | <b>%</b>         |
|---------------------------------|------------------|-----------------------------------|------------------|
|                                 | <b>abundance</b> |                                   | <b>abundance</b> |
| <b>Female plant</b>             |                  | <b>Male plant</b>                 |                  |
| <b>Root</b>                     |                  | <b>Root</b>                       |                  |
| <i>g__Acinetobacter</i>         | 29.52            | <i>g__Acinetobacter</i>           | 18.45            |
| <i>f_Haliangiaceae</i>          | 10.24            | <i>f_Haliangiaceae</i>            | 13.24            |
| <i>f_Spirochaetaceae</i>        | 7.38             | <i>f_Spirochaetaceae</i>          | 11.60            |
| <b><i>g__Pseudomonas</i></b>    | 8.45             | <i>f_Enterobacteriaceae</i>       | 1.82             |
| <i>f_Enterobacteriaceae</i>     | 5.48             | <i>c_TM7-1</i>                    | 9.37             |
| <b><i>g_Enterobacter</i></b>    | 3.93             | <b><i>g_Herbaspirillum</i></b>    | 8.44             |
| <i>f_Bradyrhizobiaceae</i>      | 6.07             | <i>f_Bradyrhizobiaceae</i>        | 4.92             |
| <i>g_Ralstonia</i>              | 1.67             | <i>g_Ralstonia</i>                | 1.52             |
| <b><i>g_Pantoea</i></b>         | 10.60            | <i>g_Turneriella</i>              | 4.28             |
| <i>g_Turneriella</i>            | 0.95             | <i>g_Spirochaeta</i>              | 3.34             |
| <i>g_Spirochaeta</i>            | 1.90             | <b><i>g_Duganella</i></b>         | 4.22             |
| <b><i>p_OD1</i></b>             | 9.64             | <b><i>f_Hyphomicrobiaceae</i></b> | 3.93             |
| <i>p_TM7</i>                    | 3.33             | <b><i>f_Spingomonadaceae</i></b>  | 3.28             |
|                                 |                  | <i>g_Lentzea</i>                  | 3.11             |
|                                 |                  | <b><i>g_Mesorhizobium</i></b>     | 2.64             |
|                                 |                  | <b><i>f_Rhodospirillaceae</i></b> | 1.93             |
|                                 |                  | <b><i>g_Virgisporangium</i></b>   | 1.58             |
|                                 |                  | <b><i>g_Paracoccus</i></b>        | 0.76             |
|                                 |                  | <b><i>f_Legionellaceae</i></b>    | 0.59             |
|                                 |                  | <b><i>g_Turicibacter</i></b>      | 0.59             |
|                                 |                  | <b><i>o_Rhizobiales</i></b>       | 0.41             |
| <b>Leaf</b>                     |                  | <b>Leaf</b>                       |                  |
| <i>g__Acinetobacter</i>         | 1.80             | <i>g__Acinetobacter</i>           | 83.18            |
| <b><i>g__Pseudomonas</i></b>    | 48.65            | <b><i>g_Vogesella</i></b>         | 16.82            |

|                               |       |
|-------------------------------|-------|
| f_ <i>Enterobacteriaceae</i>  | 15.02 |
| <b>g_ <i>Enterobacter</i></b> | 34.54 |

| Stem                                 |       | Stem                          |        |
|--------------------------------------|-------|-------------------------------|--------|
| g_ <i>Acinetobacter</i>              | 32.88 | g_ <i>Acinetobacter</i>       | 23.02  |
| <b>f_ <i>Methylobacteriaceae</i></b> | 7.53  | <b>g_ <i>Bacillus</i></b>     | 49.21  |
| <b>g_ <i>Methylothera</i></b>        | 23.97 | <b>g_ <i>Arthrobacter</i></b> | 27.78  |
| <b>g_ <i>Rheinheimera</i></b>        | 21.92 |                               |        |
| <b>g_ <i>Aeromonas</i></b>           | 13.70 |                               |        |
| Flower                               |       | Flower                        |        |
| g_ <i>Acinetobacter</i>              | 17.74 | g_ <i>Acinetobacter</i>       | 100.00 |
| f_ <i>Enterobacteriaceae</i>         | 82.26 |                               |        |
| Fruit pulp                           |       |                               |        |
| g_ <i>Acinetobacter</i>              | 33.72 |                               |        |
| <b>g_ <i>Macrococcus</i></b>         | 47.26 |                               |        |
| g_ <i>Ralstonia</i>                  | 10.09 |                               |        |
| <b>g_ <i>Facklamia</i></b>           | 5.76  |                               |        |
| <b>g_ <i>Propionibacterium</i></b>   | 3.17  |                               |        |
| Fruit seeds                          |       |                               |        |
| f_ <i>Enterobacteriaceae</i>         | 31.21 |                               |        |
| g_ <i>Ralstonia</i>                  | 17.34 |                               |        |
| <b>p_ <i>Proteobacteria</i></b>      | 32.95 |                               |        |
| <b>f_ <i>Methylobacteriaceae</i></b> | 18.50 |                               |        |

Distinct groups specific to male and female plants are written in bold

**Table S2 LEfSe analysis statistical data for each taxon by sample groups as calculated for presentation in Fig. 5**

|                             | <i>p</i> values | FDR      | Female<br>flower | Female<br>fruit | Female<br>leaf | Female<br>root | Female<br>stem | Male<br>flower | Male<br>leaf | Male root | Male stem | Seed<br>female<br>plant | LDA score |
|-----------------------------|-----------------|----------|------------------|-----------------|----------------|----------------|----------------|----------------|--------------|-----------|-----------|-------------------------|-----------|
| <i>Pseudarthrobacter</i>    | 0.000672        | 0.001756 | 0                | 0               | 0              | 0              | 0              | 0              | 0            | 0         | 442750    | 0                       | 5.35      |
| <i>Bacillus</i>             | 0.000672        | 0.001756 | 0                | 0               | 0              | 0              | 0              | 0              | 0            | 0         | 3696200   | 0                       | 6.27      |
| <i>Pseudomonas</i>          | 0.000675        | 0.001756 | 0                | 0               | 6667800        | 776970         | 0              | 0              | 0            | 0         | 0         | 0                       | 6.52      |
| <i>Escherichia_Shigella</i> | 0.001744        | 0.003779 | 0                | 0               | 1059900        | 51282          | 0              | 0              | 0            | 79794     | 0         | 1156000                 | 5.76      |
| <i>Acinetobacter</i>        | 0.002155        | 0.003978 | 8321400          | 9101400         | 274780         | 7732300        | 9313100        | 8862800        | 1.00E+07     | 7853800   | 3005600   | 3737100                 | 6.69      |
| <i>Methylobacterium</i>     | 0.002753        | 0.003978 | 0                | 0               | 0              | 0              | 387710         | 0              | 0            | 0         | 0         | 1884600                 | 5.97      |
| <i>Ralstonia</i>            | 0.003058        | 0.003978 | 1678600          | 898640          | 0              | 221410         | 299230         | 998290         | 0            | 368470    | 129630    | 2942600                 | 6.17      |
| <i>Enterobacter</i>         | 0.003292        | 0.003978 | 0                | 0               | 1997500        | 343380         | 0              | 0              | 0            | 65493     | 0         | 279610                  | 6         |
| <i>Rhodomicrobium</i>       | 0.003661        | 0.003978 | 0                | 0               | 0              | 17094          | 0              | 0              | 0            | 485670    | 0         | 0                       | 5.39      |
| <i>Pantoea_agglomerans</i>  | 0.000672        | 0.003497 | 0                | 0               | 0              | 1739100        | 0              | 0              | 0            | 0         | 0         | 0                       | 5.94      |
| <i>Massilia</i>             | 0.000672        | 0.001266 | 0                | 0               | 0              | 0              | 0              | 0              | 0            | 288870    | 0         | 0                       | 5.16      |

(FDR: false discovery rate)

**Table S3 Different pathways are enriched through functional prediction of genes from the endophytic bacterial community.**

| Pathway                                                | Size | Hits |
|--------------------------------------------------------|------|------|
| Phenylpropanoid biosynthesis                           | 2    | 2    |
| Novobiocin biosynthesis                                | 4    | 4    |
| Tropane, piperidine and pyridine alkaloid biosynthesis | 5    | 5    |
| Fructose and mannose metabolism                        | 33   | 33   |
| Ascorbate and aldarate metabolism                      | 17   | 17   |
| Teichoic acid biosynthesis                             | 3    | 3    |
| Naphthalene degradation                                | 5    | 5    |
| Chloroalkane and chloroalkene degradation              | 7    | 7    |
| Retinol metabolism                                     | 2    | 2    |
| Glycosaminoglycan degradation                          | 2    | 2    |
| Other glycan degradation                               | 2    | 2    |
| Lipopolysaccharide biosynthesis                        | 19   | 19   |
| Ubiquinone and other terpenoid-quinone biosynthesis    | 22   | 22   |
| Isoquinoline alkaloid biosynthesis                     | 5    | 5    |
| Phosphonate and phosphinate metabolism                 | 6    | 6    |
| Biosynthesis of unsaturated fatty acids                | 2    | 2    |
| Lysine degradation                                     | 16   | 16   |
| Polycyclic aromatic hydrocarbon degradation            | 3    | 3    |
| Vitamin B6 metabolism                                  | 9    | 9    |
| Sphingolipid metabolism                                | 5    | 5    |
| Prodigiosin biosynthesis                               | 3    | 3    |
| Benzoate degradation                                   | 25   | 25   |
| Glycolysis / Gluconeogenesis                           | 26   | 26   |
| Citrate cycle (TCA cycle)                              | 12   | 12   |
| Arginine biosynthesis                                  | 19   | 19   |
| Terpenoid backbone biosynthesis                        | 17   | 17   |
| Tyrosine metabolism                                    | 27   | 27   |
| Biotin metabolism                                      | 13   | 13   |

|                                                     |    |    |
|-----------------------------------------------------|----|----|
| Pyruvate metabolism                                 | 33 | 33 |
| Fatty acid biosynthesis                             | 11 | 11 |
| Tryptophan metabolism                               | 19 | 19 |
| Arginine and proline metabolism                     | 42 | 42 |
| Glycerolipid metabolism                             | 14 | 14 |
| Carbon fixation in photosynthetic organisms         | 17 | 17 |
| Fatty acid degradation                              | 14 | 14 |
| Butanoate metabolism                                | 32 | 32 |
| Galactose metabolism                                | 22 | 22 |
| Carbapenem biosynthesis                             | 2  | 2  |
| Carotenoid biosynthesis                             | 7  | 7  |
| Alanine, aspartate and glutamate metabolism         | 23 | 23 |
| Starch and sucrose metabolism                       | 32 | 32 |
| Linoleic acid metabolism                            | 2  | 2  |
| Phenylalanine metabolism                            | 27 | 27 |
| Nitrogen metabolism                                 | 13 | 13 |
| Pantothenate and CoA biosynthesis                   | 18 | 18 |
| Pentose phosphate pathway                           | 30 | 30 |
| Phenylalanine, tyrosine and tryptophan biosynthesis | 20 | 20 |
| Dioxin degradation                                  | 4  | 4  |
| Nicotinate and nicotinamide metabolism              | 16 | 16 |
| Carbon fixation pathways in prokaryotes             | 22 | 22 |
| Glycerophospholipid metabolism                      | 15 | 15 |
| Valine, leucine and isoleucine degradation          | 25 | 25 |
| Limonene and pinene degradation                     | 3  | 3  |
| Purine metabolism                                   | 60 | 60 |
| Styrene degradation                                 | 11 | 11 |
| Sulfur metabolism                                   | 14 | 14 |
| Glyoxylate and dicarboxylate metabolism             | 41 | 41 |
| beta-Alanine metabolism                             | 19 | 19 |

|                                                     |    |    |
|-----------------------------------------------------|----|----|
| Phenazine biosynthesis                              | 2  | 2  |
| Amino sugar and nucleotide sugar metabolism         | 50 | 50 |
| Lipoic acid metabolism                              | 3  | 3  |
| Atrazine degradation                                | 3  | 3  |
| Pentose and glucuronate interconversions            | 28 | 28 |
| Histidine metabolism                                | 16 | 16 |
| Glucosinolate biosynthesis                          | 2  | 2  |
| Taurine and hypotaurine metabolism                  | 6  | 6  |
| Thiamine metabolism                                 | 18 | 18 |
| Biosynthesis of vancomycin group antibiotics        | 2  | 2  |
| Cysteine and methionine metabolism                  | 44 | 44 |
| Acarbose and validamycin biosynthesis               | 2  | 2  |
| Ethylbenzene degradation                            | 2  | 2  |
| O-Antigen nucleotide sugar biosynthesis             | 23 | 23 |
| Folate biosynthesis                                 | 23 | 23 |
| Aminobenzoate degradation                           | 8  | 8  |
| Lysine biosynthesis                                 | 15 | 15 |
| Cyanoamino acid metabolism                          | 6  | 6  |
| Propanoate metabolism                               | 33 | 33 |
| Xylene degradation                                  | 7  | 7  |
| Valine, leucine and isoleucine biosynthesis         | 9  | 9  |
| Oxidative phosphorylation                           | 9  | 9  |
| Metabolism of xenobiotics by cytochrome P450        | 3  | 3  |
| Biosynthesis of various plant secondary metabolites | 3  | 3  |
| alpha-Linolenic acid metabolism                     | 3  | 3  |
| Drug metabolism - cytochrome P450                   | 4  | 4  |
| D-Amino acid metabolism                             | 15 | 15 |
| Inositol phosphate metabolism                       | 15 | 15 |
| Pyrimidine metabolism                               | 39 | 39 |
| Glutathione metabolism                              | 14 | 14 |

|                                                            |    |    |
|------------------------------------------------------------|----|----|
| Drug metabolism - other enzymes                            | 11 | 11 |
| Geraniol degradation                                       | 4  | 4  |
| Streptomycin biosynthesis                                  | 9  | 9  |
| Glycine, serine and threonine metabolism                   | 37 | 37 |
| Methane metabolism                                         | 32 | 32 |
| Ether lipid metabolism                                     | 3  | 3  |
| Selenocompound metabolism                                  | 9  | 9  |
| Polyketide sugar unit biosynthesis                         | 4  | 4  |
| Glycosphingolipid biosynthesis - globo and isoglobo series | 2  | 2  |
| Porphyrin metabolism                                       | 42 | 42 |
| Monobactam biosynthesis                                    | 7  | 7  |
| Toluene degradation                                        | 4  | 4  |
| Caprolactam degradation                                    | 5  | 5  |
| One carbon pool by folate                                  | 11 | 11 |
| C5-Branched dibasic acid metabolism                        | 7  | 7  |
| Riboflavin metabolism                                      | 14 | 14 |
| Chlorocyclohexane and chlorobenzene degradation            | 6  | 6  |
| Peptidoglycan biosynthesis                                 | 12 | 12 |
| Fluorobenzoate degradation                                 | 6  | 6  |

---



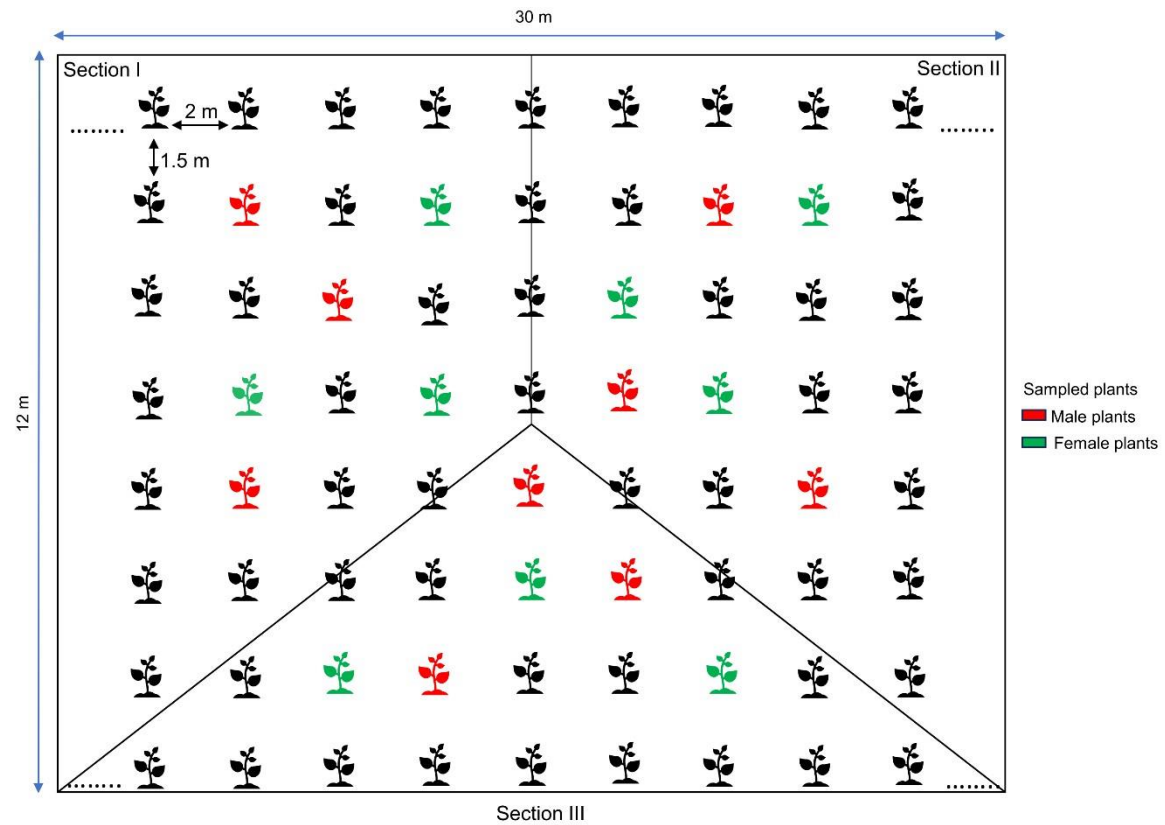

**Fig. S1 Sampling layout for collection of samples for sequencing.** Plot depicting *Siraitia grosvenorii* plants cultivated in the farm at CSIR-IHBT, Palampur, where both male and female plants were grown randomly. For sampling, the plot was divided into three sections and from each section, 3 male plants (red coloured) and 3 female plants (green coloured) were taken for sampling. Therefore, a total of 9 male plants and 9 female plants were taken for harvesting their samples of respective plant parts. Samples (each plant-part of a plant) of 3 plants (collected from each section) were pooled and considered as one replicate and a total of 3 replicates were used for sequencing for each plant-part of both male and female plants.

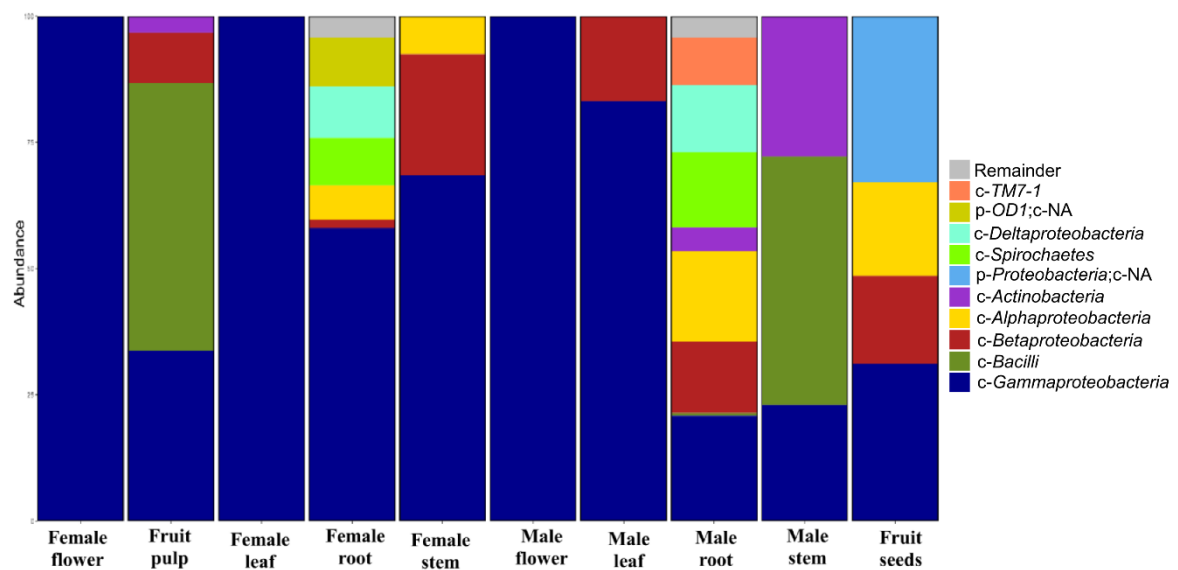

**Fig. S2 Relative abundance of different taxa at class level in different parts of male and female *S. grosvenorii* plants.**

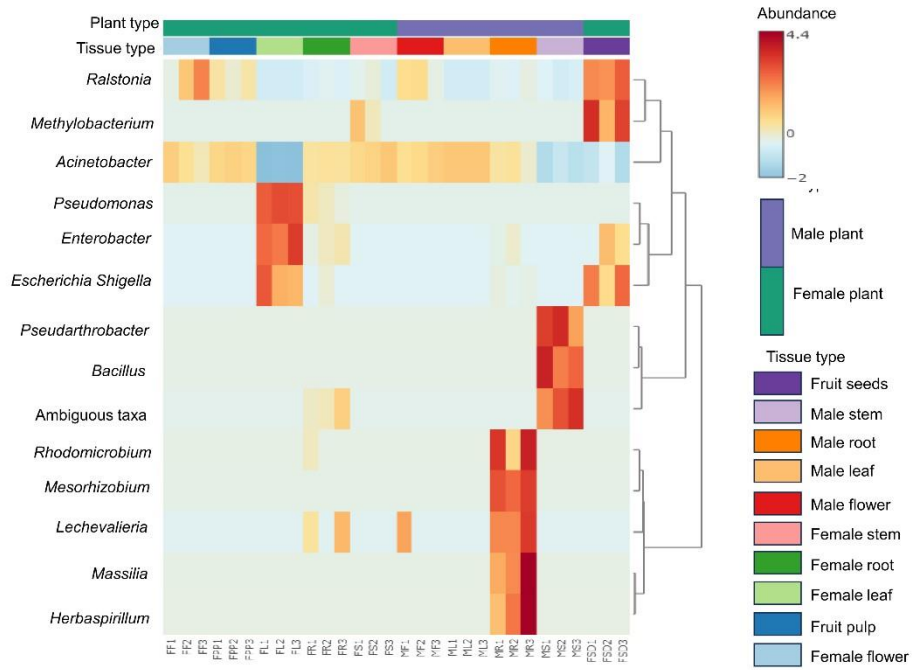

**Fig. S3 Heat map depicts the abundance of different taxa in various tissues of male and female plants of *S. grosvenorii*.** (FF1-FF2: Female flower; FPP1-FPP3: Fruit pulp; FL1-FL3: Female leaf; FR1-FR3: Female root; FS1-FS3: Female stem; MF1-MF3: Male flower; ML1-ML3: Male leaf; MR1-MR3: Male root; MS1-MS3: Male stem; FSD1-FSD3: Fruit seeds)
